# Supplementary material for: Finite-momentum excitons and the role of electron–phonon couplings in the electronic and phonon transport properties of boron arsenide
Source: Royal Society of Chemistry journal article supplement (doi:10.1039/d1cp05979c), 2022-01-01
Supplement: d1cp05979c1.pdf [file d1cp05979c1.pdf]

## Supplementary information

### Finite-momentum excitons and role of electron-phonon couplings to electronic and phonon transport properties in boron arsenide

Haodong Mei,<sup>1</sup> Yujie Xia,<sup>1</sup> Yiming Zhang,<sup>1</sup> Yu Wu,<sup>1</sup> Ying Chen,<sup>2</sup> Congcong  
Ma,<sup>2</sup> Mingran Kong,<sup>1</sup> Lei Peng,<sup>1</sup> Heyuan Zhu,<sup>1</sup> and Hao Zhang<sup>1,3,\*</sup>

<sup>1</sup>*Key Laboratory for Information Science of Electromagnetic Waves  
(MOE) and Department of Optical Science and Engineering and  
Key Laboratory of Micro and Nano Photonic Structures (MOE),  
Fudan University, Shanghai 200433, China*

<sup>2</sup>*Department of Light Sources and Illuminating Engineering,  
Fudan University, Shanghai 200433, China*

<sup>3</sup>*Yiwu Research Institute of Fudan University,  
Chengbei Road, Yiwu City, Zhejiang 322000, China*

Table S1. Calculated high frequency dielectric constants  $\epsilon_\infty$ , static dielectric constants  $\epsilon_0$ , averaged longitudinal elastic constant  $C$  and POP frequencies  $\omega_{POP}$  for strain-engineering BAs.

| strain type | strain(%) | $\epsilon_\infty$ | $\epsilon_0$ | $C$ (GPa) | $\omega_{POP}$ (THz) | $m_e$ ( $m_0$ ) | $m_h$ ( $m_0$ ) |
|-------------|-----------|-------------------|--------------|-----------|----------------------|-----------------|-----------------|
| unstrain    | 0         | 10.14             | 10.28        | 262.41    | 20.24                | 0.252           | 0.237           |
| uniaxial    | -4        | 10.13             | 10.42        | 296.41    | 20.27                | 0.254           | 0.186           |
|             | -3        | 10.07             | 10.35        | 288.04    | 20.32                | 0.257           | 0.201           |
|             | -2        | 10.28             | 10.17        | 279.48    | 20.82                | 0.257           | 0.217           |
|             | -1        | 10.16             | 10.2         | 271.11    | 21.27                | 0.259           | 0.237           |
|             | 1         | 10.23             | 10.29        | 255.36    | 21.54                | 0.275           | 0.237           |
|             | 2         | 10.13             | 10.33        | 248.68    | 21.63                | 0.278           | 0.221           |
|             | 3         | 10.25             | 10.31        | 242.01    | 21.39                | 0.277           | 0.214           |
|             | 4         | 10.25             | 10.3         | 235.44    | 21.84                | 0.276           | 0.216           |
|             | 5         | 10.24             | 10.28        | 229.12    | 22.04                | 0.277           | 0.224           |
|             | 6         | 10.22             | 10.26        | 223.05    | 22.18                | 0.274           | 0.233           |
| triaxial    | -4        | 12.64             | 12.87        | 335.28    | 22.09                | 0.154           | 0.186           |
|             | -3        | 12.44             | 12.77        | 323.59    | 22.15                | 0.157           | 0.201           |
|             | -2        | 12.4              | 12.51        | 305.58    | 21.89                | 0.157           | 0.217           |
|             | -1        | 11.7              | 11.77        | 285.15    | 20.23                | 0.159           | 0.237           |
|             | 1         | 10.65             | 10.77        | 251.45    | 20.26                | 0.275           | 0.237           |
|             | 2         | 10.46             | 10.65        | 245.18    | 20.86                | 0.278           | 0.221           |
|             | 3         | 10.49             | 10.57        | 241.59    | 21.28                | 0.277           | 0.214           |
|             | 4         | 10.65             | 10.68        | 236.41    | 22.32                | 0.276           | 0.216           |
|             | 5         | 10.68             | 10.71        | 228.31    | 22.43                | 0.277           | 0.224           |
|             | 6         | 10.79             | 10.81        | 222.61    | 22.92                | 0.274           | 0.233           |

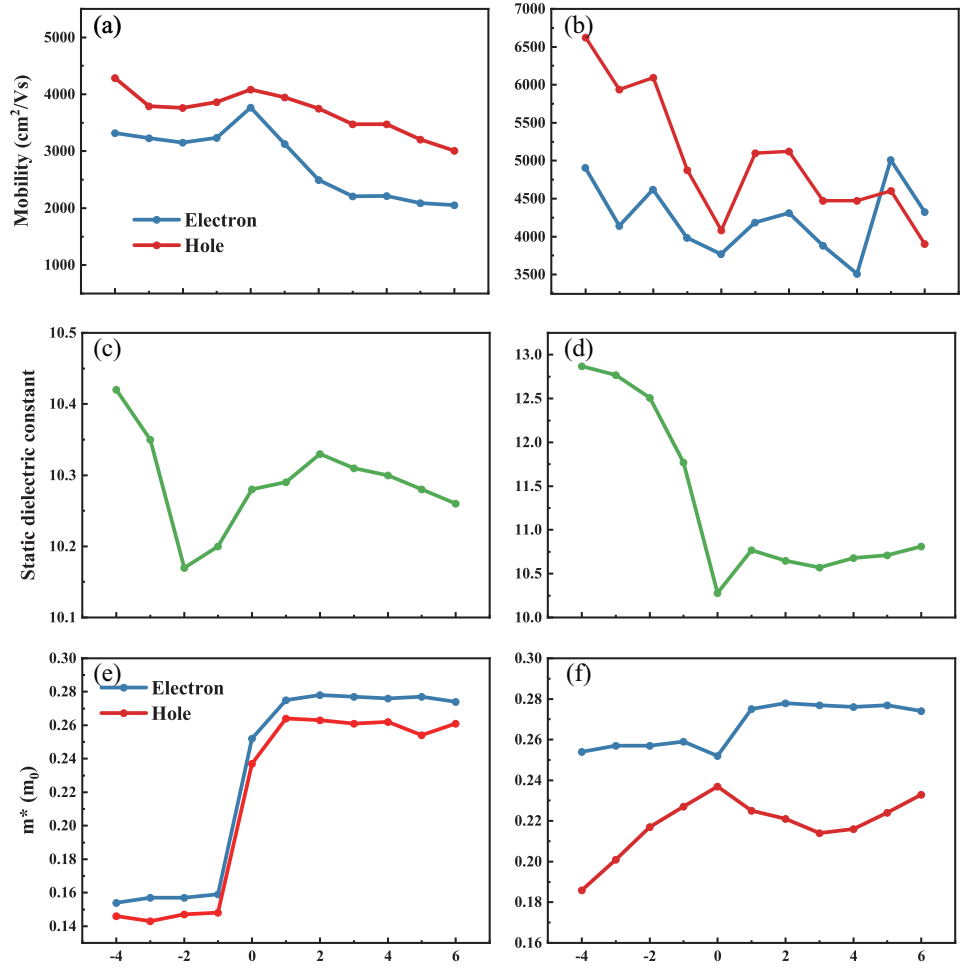

Figure S1. Mobility under different strains along (a) uniaxial directions, (b) triaxial directions. Static dielectric constant of BAs under different strains along (c) uniaxial directions, (d) triaxial directions. Effective mass under different strains along (e) uniaxial directions, (f) triaxial directions.

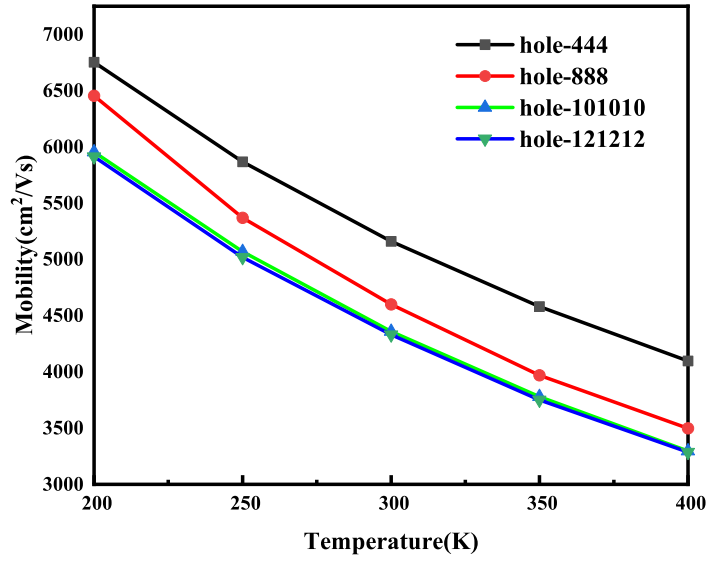

Figure S2. The convergence test of dense mesh which was used to compute scattering rates in AMSET.

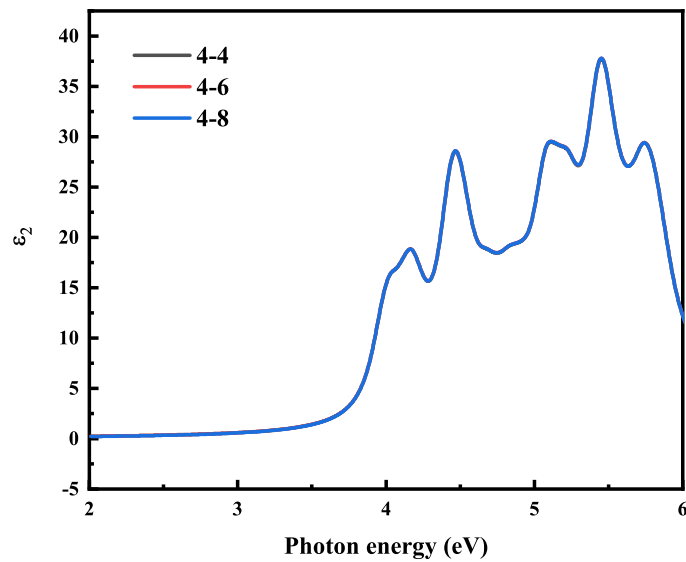

Figure S3. The convergence test for the BSE calculations by choosing the numbers of valence and conduction bands as (4,4), (4,6) and (4,8), and the calculated energy-dependent imaginary part of the dielectric functions.
